# Supplementary material for: Identifying Supervisory or Managerial Status in German Administrative Records
Source: publisher site journal article supplement (doi:10.1515/jbnst-2022-0035), 2022-07-04
Supplement: Supplementary file 1 [file readme.pdf › readme.pdf]

**Supplementary Material to „Identifying managerial and supervisory status in German administrative data“**

The supplemental material consists of the files to replicate the results in the paper and the parameter estimates to predict managerial status in the SIAB or other IAB data. To run the syntax, you will need the **esttab** ado-file. I used Stata 16 in the analysis.

The following Stata syntax files are included:

- **Master.do**: runs all files to replicate the results from the paper; generate the prediction-files
- **1\_1\_PASS\_beh\_match\_7518v2.do**: matches the PASS-survey data to administrative records
- **1\_2\_PASS\_estimation.do**: replicates the prediction results and ROC-curves from the paper
- **2\_PASS\_regressions.do**: generates the files for the prediction in the SIAB and runs the glass ceiling-regressions with PASS-data
- **3\_SIAB\_manager.do**: loads the current SIAB data, generates the relevant variables for the prediction and estimates the glass ceiling-results in the SIAB

This file also contains the following estimation results that can be loaded into stata:

- **manager\_pred.ster**: predictions from the logit-estimation with the binary indicator for managerial or supervisory status
- **manager\_pred\_3d.ster**: predictions from the logit-estimation with the 3-digit-KldB for managerial or supervisory status
- **manager\_pred\_4d.ster**: predictions from the logit-estimation with the 4-digit-KldB for managerial or supervisory status

The predictions are based on the SIAB-preparation in syntax file „3\_SIAB\_manager.do“; the files can be loaded into Stata with the following syntax, e.g. based on the 3-digit-KldB to predict managerial status if the propensity to be a manager according to the predicted values is larger than 70%:

```
est use "$data/manager_pred_3d"
```

```
predict logit_3digit
```

```
gen manager_3digit_70=1 if logit_3digit>0.7 & logit_3digit!=.
```

```
replace manager_3digit_70=0 if logit_3digit<=0.7 & logit_3digit!=.
```

This works analogous for the binary and 4-digit definition.
